# Supplementary material
Source: PubMed Central journal article supplement (PMC3988121)
Supplement: worm-2-e26548-s01.pdf [file worm-2-e26548-s01.pdf]

## **Supplemental Material to:**

**Jung H Doh, Min-Ho Lee, Yuchae Jung, Valerie Reinke**

**C. elegans RNA-binding protein GLD-1 recognizes its multiple targets using sequence, context, and structural information to repress translation**

**2013; 2(4)**

**<http://dx.doi.org/10.4161/worm.26548>**

**[www.landesbioscience.com/journals/worm/article/26548/](http://www.landesbioscience.com/journals/worm/article/26548/)**

***puf-5* (F54C9.8) 5'end**

Motif B ↑  
ag**auacu**aaccuguaacuccugugacucuguuucaauAUGAGUGACAGUACUGGAA**GAAUCAAC**  
UCGAAAGCUUCGGAUUCAUCGUCGAUCAGCGAUCACCAAACUGCCGAUCUCAGCAUUUUAACGG  
AUCCUUCGAUGGAGGUGCAUUCUCAUCGUCCAACAUUCCUCUGUUAACUUCAUGGGA  
Motif C ↑

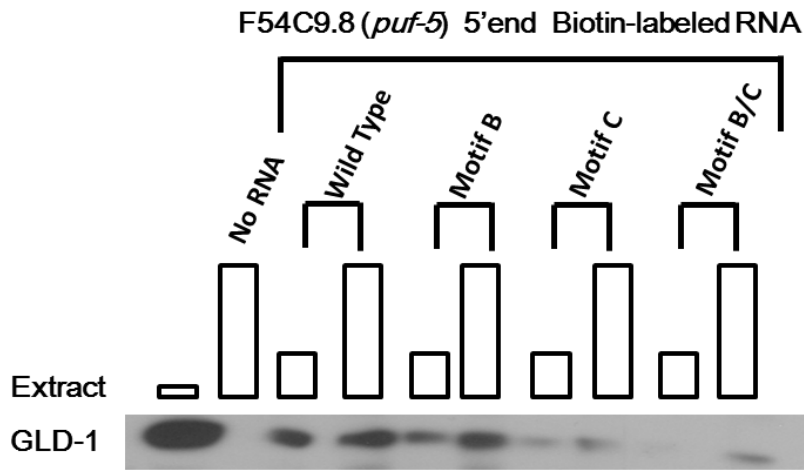

**S. Figure 1. Motif C, but not Motif B, is important for GLD-1 binding in the *puf-5* (F54C9.8) 5'end.** Single and double mutations of Motif C significantly reduce GLD-1 binding to the *puf-5* 5'end. The RNA sequence of the *puf-5* 5' end is shown (top). Sequence in lower-case represents the 5'UTR and in upper-case the first 150 nucleotides of the ORF. The Motif B and C are depicted in the sequence. The four most conserved nucleotides were mutated, where the Motif B is mutated to "UAGAUU" while the Motif C is mutated "CUUAGGA". Biotin-RNA pull down assays were performed with the wild-type and mutated *puf-5* 5' ends as described previously.

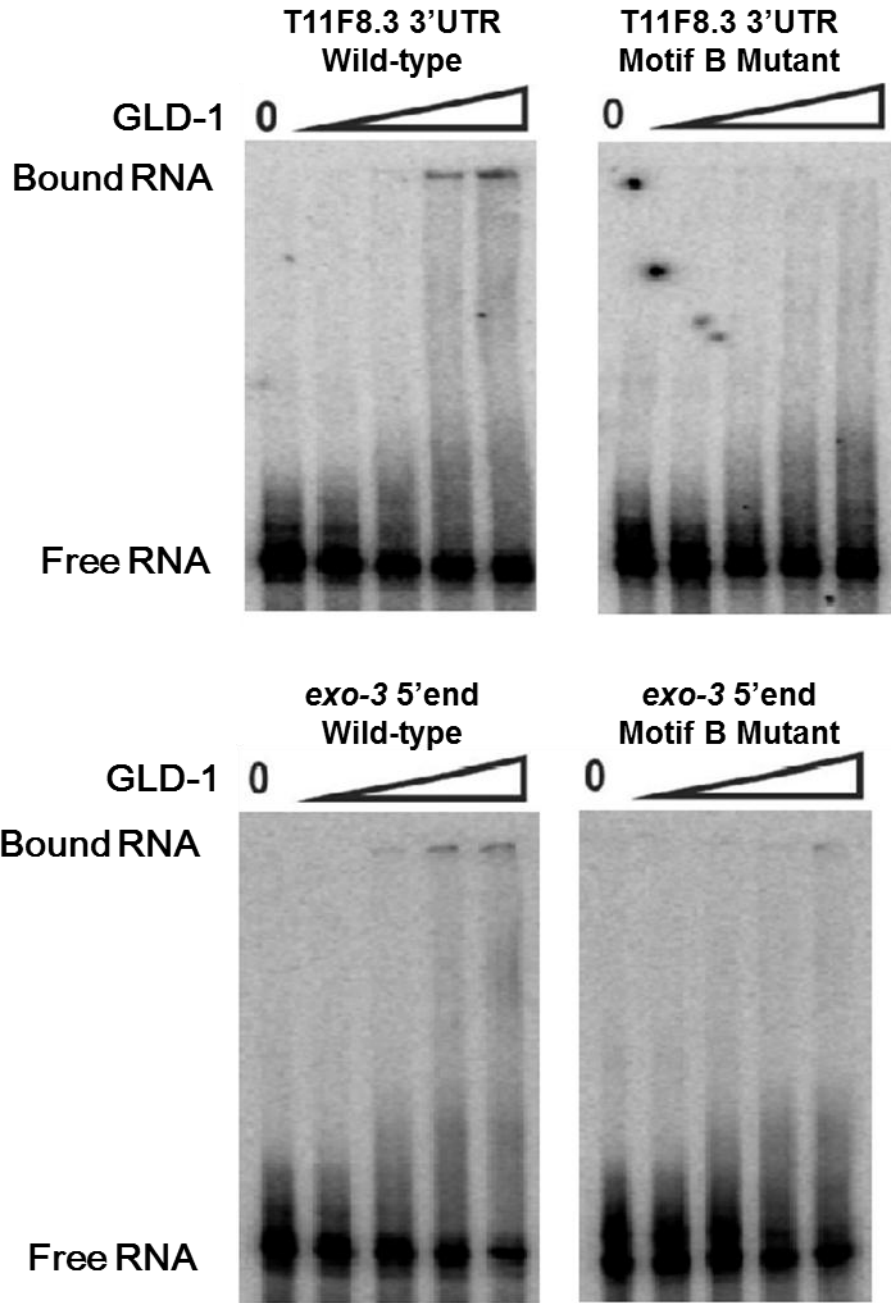

**S. Figure 2. Purified, recombinant GLD-1 binds directly to the Motif B in *rme-2* 3'UTR and *exo-3* 5'end RNAs.** EMSA was conducted to examine the ability of purified recombinant GLD-1 to bind to the wild-type and mutated Motif B in *rme-2* 3'UTR (A) and *exo-3* 5'end (B) in the absence of other RNAs and proteins. Binding reactions of 20  $\mu$ L were set up with constant amount of radiolabeled wild-type or mutated GLD-1 binding regions and in increasing concentrations of GLD-1 (1, 100, 1000, 3000, and 5000 nM), and resolved on 4.8% polyacrylamide gel (acrylamide: bis-acrylamide = 37.5:1) in 0.25 $\times$ TBE buffer.

**S. Table 1. Putative GLD-1 Targets**

| Sequence Name | Gene name     | Previously Identified | MicroarrayFL AG/IgG | Microarrayp value | Real time FLAG/IgG |
|---------------|---------------|-----------------------|---------------------|-------------------|--------------------|
| ZC513.6       | <i>oma-2</i>  | Yes                   | 13.47               | 2.43E-05          | 27.86              |
| T05G5.7       | <i>rmd-1</i>  | Yes                   | 8.75                | 1.13E-03          | 28.84              |
| T11F8.3       | <i>rme-2</i>  | Yes                   | 8.36                | 7.81E-05          | 13.00              |
| Y75B12B.1     |               | Yes                   | 8.01                | 7.88E-04          | 22.63              |
| C50B6.2       | <i>nasp-2</i> |                       | 7.66                | 6.27E-04          | 10.56              |
| C07G2.1       | <i>cej-1</i>  | Yes                   | 7.40                | 2.27E-04          | 19.03              |
| F32B6.5       | <i>sss-1</i>  |                       | 6.10                | 1.01E-02          | 35.51              |
| F56A3.2       | <i>slx-1</i>  |                       | 5.59                | 3.10E-03          | 9.85               |
| F44D12.4      | <i>gipc-2</i> |                       | 5.11                | 5.94E-03          | 10.93              |
| R01B10.4      |               |                       | 4.90                | 1.97E-04          | 6.96               |
| H02I12.1      | <i>cbd-1</i>  |                       | 4.87                | 1.84E-04          | 3.73               |
| R09B3.1       | <i>exo-3</i>  | Yes                   | 4.83                | 1.08E-03          | 20.39              |
| T01H8.1       | <i>rskn-1</i> |                       | 4.69                | 9.77E-04          | 8.88               |
| F44E7.2       |               |                       | 4.57                | 2.18E-04          | 6.73               |
| C18G1.9       |               |                       | 4.43                | 1.40E-02          | 16.56              |
| F25H9.6       |               |                       | 4.33                | 1.25E-02          | 6.06               |
| C35D10.2      | <i>gipc-1</i> |                       | 4.20                | 1.11E-02          | 14.42              |
| C09G9.6       | <i>oma-1</i>  | Yes                   | 4.17                | 8.13E-07          | 3.31               |
| ZK829.5       | <i>tbx-36</i> |                       | 4.11                | 5.55E-03          | 7.46               |
| ZK632.13      | <i>lin-52</i> |                       | 4.05                | 8.71E-03          | 6.73               |
| F14B4.2       |               | Yes                   | 4.04                | 2.62E-02          | 10.20              |
| Y44E3B.1      | <i>zip-4</i>  |                       | 4.00                | 3.70E-03          | 19.03              |
| T23G11.2      | <i>gna-2</i>  | Yes                   | 3.99                | 3.82E-04          | 3.86               |
| W09C5.2       | <i>unc-59</i> |                       | 3.90                | 4.22E-03          | 5.66               |
| C04F12.7      |               |                       | 3.87                | 3.61E-02          | 30.91              |
| T07A9.6       | <i>daf-18</i> |                       | 3.84                | 7.03E-04          | 7.21               |

|           |               |     |      |          |       |
|-----------|---------------|-----|------|----------|-------|
| F43G6.1   | <i>dna-2</i>  |     | 3.68 | 5.06E-03 | 4.59  |
| K09H11.7  |               |     | 3.63 | 7.74E-04 | 1.15  |
| F22B3.4   |               |     | 3.62 | 6.79E-04 | 5.10  |
| T10C6.8   | <i>hpo-42</i> |     | 3.61 | 5.87E-03 | 6.50  |
| F10C2.4   |               |     | 3.59 | 3.99E-03 | 5.66  |
| C17E4.3   |               |     | 3.51 | 9.88E-04 | 5.86  |
| F54C9.8   | <i>puf-5</i>  | Yes | 3.45 | 1.51E-04 | 2.93  |
| C01G8.1   |               |     | 3.41 | 3.66E-03 | 2.55  |
| T01C3.2   |               |     | 3.38 | 1.46E-02 | 4.29  |
| C48E7.7   |               |     | 3.38 | 3.48E-02 | 40.79 |
| C28D4.3   | <i>gln-6</i>  |     | 3.36 | 1.07E-03 | 4.14  |
| F26D10.10 | <i>gln-5</i>  | Yes | 3.32 | 8.08E-05 | 2.93  |
| R12C12.7  |               |     | 3.26 | 1.58E-02 | 3.86  |
| C53A3.2   |               |     | 3.25 | 2.02E-03 | 4.44  |
| F22B7.6   | <i>polk-1</i> |     | 3.25 | 9.40E-04 | 2.30  |
| C02B10.2  |               |     | 3.24 | 1.87E-02 | 2.46  |
| T03F6.3   |               |     | 3.24 | 3.21E-03 |       |
| F18A1.7   |               |     | 3.24 | 2.41E-03 | 3.36  |
| F59A3.4   |               |     | 3.23 | 5.92E-04 | 2.00  |
| K08F9.2   | <i>aipl-1</i> |     | 3.20 | 1.69E-02 | 2.46  |
| T03D8.1   | <i>num-1</i>  |     | 3.19 | 1.08E-03 | 3.25  |
| T27E9.3   | <i>cdk-5</i>  |     | 3.13 | 8.32E-03 | 3.73  |
| C18G1.5   | <i>hil-4</i>  |     | 3.10 | 2.13E-03 |       |
| F43D9.4   | <i>sip-1</i>  |     | 2.99 | 1.03E-02 |       |
| C55A6.1   |               |     | 2.95 | 3.13E-02 | 0.90  |
| T23B12.6  |               |     | 2.91 | 1.16E-03 |       |
| Y49E10.14 | <i>pie-1</i>  |     | 2.90 | 6.26E-03 | 5.66  |
| ZC317.6   |               |     | 2.84 | 4.28E-02 | 3.25  |
| ZK973.6   | <i>anc-1</i>  |     | 2.83 | 4.05E-03 | 0.84  |
| Y39E4B.5  |               |     | 2.79 | 1.04E-03 | 3.25  |

|           |                |      |          |      |
|-----------|----------------|------|----------|------|
| K07H8.9   |                | 2.74 | 7.26E-03 | 4.29 |
| K07A1.8   | <i>ile-1</i>   | 2.70 | 8.44E-03 | 3.36 |
| T19B10.11 | <i>mxl-1</i>   | 2.70 | 3.69E-02 | 2.64 |
| F27C8.6   | <i>trcs-1</i>  | 2.68 | 8.12E-04 | 2.30 |
| F07H5.3   |                | 2.68 | 4.91E-03 |      |
| C39E9.13  | <i>rfc-3</i>   | 2.65 | 3.93E-03 | 1.80 |
| C28C12.2  | <i>mesp-1</i>  | 2.62 | 3.43E-03 | 2.46 |
| ZK973.a   | <i>pdp-1</i>   | 2.61 | 4.84E-03 | 0.97 |
| C33H5.14  | <i>ntp-1</i>   | 2.59 | 6.00E-03 | 2.73 |
| F07H5.10  |                | 2.59 | 1.84E-03 | 3.61 |
| F55G1.6   |                | 2.58 | 5.01E-03 | 3.03 |
| C50F4.5   | <i>his-41</i>  | 2.57 | 2.56E-03 | 3.48 |
| Y47G6A.8  | <i>crn-1</i>   | 2.55 | 3.01E-03 | 2.38 |
| Y73F4A.1  |                | 2.55 | 4.73E-03 | 3.25 |
| F19B6.2   | <i>ufd-1</i>   | 2.55 | 3.61E-03 | 3.48 |
| F35G12.4  |                | 2.54 | 4.57E-05 |      |
| ZK863.4   |                | 2.54 | 1.71E-03 |      |
| T13F2.9   |                | 2.53 | 2.06E-02 |      |
| Y43E12A.1 | <i>cyb-2.1</i> | 2.50 | 5.86E-04 |      |
| R02F2.4   |                | 2.49 | 1.96E-03 |      |
| F42G9.5   | <i>alh-11</i>  | 2.45 | 5.01E-03 |      |
| C36B1.11  |                | 2.44 | 3.80E-03 |      |
| B0280.10  | <i>pot-1</i>   | 2.42 | 6.55E-04 |      |
| K01C8.3   | <i>tdc-1</i>   | 2.39 | 3.31E-03 |      |
| ZK593.8   | <i>fic-1</i>   | 2.38 | 5.08E-04 |      |
| F35C11.5  |                | 2.38 | 1.11E-04 |      |
| ZK1058.3  |                | 2.38 | 1.71E-03 |      |
| M04F3.1   | <i>rpa-2</i>   | 2.37 | 1.01E-03 |      |
| C30F12.4  |                | 2.36 | 5.74E-04 |      |
| F59B2.3   |                | 2.36 | 7.61E-03 |      |

|           |               |     |      |          |      |
|-----------|---------------|-----|------|----------|------|
| K04F10.1  |               |     | 2.33 | 2.14E-03 |      |
| R01H2.3   | <i>egg-2</i>  | Yes | 2.32 | 1.27E-02 |      |
| C50E3.12  |               |     | 2.32 | 2.66E-03 |      |
| Y43C5A.5  | <i>thk-1</i>  |     | 2.32 | 9.13E-04 |      |
| C52E12.3  | <i>sqv-7</i>  |     | 2.30 | 1.12E-03 |      |
| C10F3.1   | <i>cpg-4</i>  |     | 2.30 | 1.80E-04 |      |
| C26E6.7   | <i>eri-9</i>  |     | 2.29 | 3.10E-03 |      |
| T22C1.6   |               |     | 2.29 | 2.82E-02 |      |
| C01F6.4   | <i>fem-3</i>  |     | 2.25 | 2.54E-03 | 2.00 |
| T25G3.2   | <i>chi-1</i>  |     | 2.25 | 1.97E-03 |      |
| F36F2.4   | <i>syx-7</i>  |     | 2.24 | 3.90E-02 |      |
| R01E6.3   | <i>cah-4</i>  |     | 2.24 | 1.05E-02 |      |
| F10C2.2   | <i>kup-1</i>  |     | 2.22 | 4.84E-02 |      |
| T27F2.3   | <i>bir-1</i>  |     | 2.21 | 2.66E-03 |      |
| Y48G1BL.3 | <i>puf-10</i> | Yes | 2.19 | 1.57E-03 |      |
| R07E5.8   | <i>cku-80</i> |     | 2.18 | 1.51E-02 |      |
| F35B12.5  | <i>sas-5</i>  |     | 2.16 | 5.51E-05 |      |
| R12E2.10  | <i>egg-5</i>  |     | 2.16 | 4.75E-03 |      |
| ZK177.5   | <i>ccp-44</i> |     | 2.16 | 1.03E-03 |      |
| F32G8.6   | <i>cat-4</i>  |     | 2.15 | 2.11E-02 |      |
| R05H5.4   |               |     | 2.15 | 4.10E-03 |      |
| F54C8.2   | <i>cpar-1</i> |     | 2.15 | 1.78E-03 |      |
| F56C9.6   |               |     | 2.14 | 4.41E-03 |      |
| F01F1.12  | <i>aldo-2</i> |     | 2.14 | 8.81E-03 |      |
| R03D7.7   | <i>nos-1</i>  |     | 2.14 | 2.64E-03 |      |
| T25B6.2   | <i>nep-22</i> |     | 2.13 | 5.54E-03 |      |
| F30A10.6  | <i>sac-1</i>  |     | 2.13 | 1.79E-02 |      |
| C32E8.8   | <i>ptr-2</i>  |     | 2.13 | 1.19E-03 |      |
| C14B1.9   |               |     | 2.11 | 1.75E-03 |      |
| Y45F10A.2 | <i>puf-3</i>  |     | 2.11 | 1.32E-03 |      |

|           |                |     |      |          |      |
|-----------|----------------|-----|------|----------|------|
| T05F1.2   |                |     | 2.07 | 3.16E-03 |      |
| W02F12.4  |                |     | 2.06 | 1.83E-03 |      |
| C34G6.5   | <i>cdc-7</i>   |     | 2.06 | 2.93E-03 |      |
| Y75B12B.3 |                |     | 2.06 | 1.93E-02 |      |
| F08H9.7   | <i>clec-56</i> |     | 2.04 | 3.00E-02 |      |
| F58A4.4   | <i>pri-1</i>   |     | 2.03 | 5.31E-03 | 2.22 |
| F57B10.12 | <i>mei-2</i>   |     | 2.02 | 1.30E-03 |      |
| Y62H9A.6  |                |     | 2.02 | 1.26E-02 |      |
| H02I12.5  |                | Yes | 2.02 | 5.23E-03 |      |
| C17G1.3   | <i>ugt-23</i>  |     | 2.02 | 4.28E-02 |      |
| F54F2.2   | <i>zfp-1</i>   |     | 2.02 | 5.44E-03 |      |
| F47D12.7  | F47D12.7       |     | 2.01 | 1.05E-02 |      |
| C34H4.3   |                |     | 2.00 | 2.30E-02 |      |
| T05G5.3   | <i>cdk-1</i>   |     | 1.20 | 0.05768  | 1.07 |
| H12I13.4  | <i>fbf-1</i>   |     | 1.04 | 0.60626  | 1.11 |
| F21H12.5  | <i>fbf-2</i>   |     | 1.09 | 0.40439  | 1.32 |



**S. Table 2. Functional analysis of GLD-1 targets**

| Function                                                           | Gene Size | Observed Genes | Significance | Genes(symbol)                                                                                                                                                                                                                                                                                                                                                                           |
|--------------------------------------------------------------------|-----------|----------------|--------------|-----------------------------------------------------------------------------------------------------------------------------------------------------------------------------------------------------------------------------------------------------------------------------------------------------------------------------------------------------------------------------------------|
| embryonic development ending in birth or egg hatching (GO:0009792) | 2338      | 46             | 1.52E-10     | C50F4.6, cyb-2.1, egg-4, F22B3.4, cdk-5, H02112.1, gln-6, mei-2, C02B10.2, sqv-7, F56A3.2, ptr-2, F18A1.7, pie-1, zfp-1, 04F3.1, C14B1.9, C17E4.3,<br>H02112.5, sas-5, T23B12.6, C28C12.2, R12C12.7, rmd-1, F19B6.1, Syntaxin, esterase, crn-1, thk-1, hum-1, dna-2, nasp-2, cpar-1, F10C2.4, rme-2, chs-1, unc-59, F01F1.12, exo-3, F30A10.6, pri-1, bir-1, gna-2, fem-3, rfc-3, puf-3 |
| cytokinesis (GO:0000910)                                           | 105       | 9              | 8.78E-08     | cyb-2.1, F22B3.4, ptr-2, C28C12.2, Syntaxin, F10C2.4, pri-1, gna-2, puf-3                                                                                                                                                                                                                                                                                                               |
| protein binding (GO:0005515)                                       | 2098      | 38             | 1.04E-07     | H02112.1, gln-6, mei-2, hexokinase, F25H9.6, F56A3.2, rskn-1, pie-1, zfp-1, M04F3.1, sss-1, C17E4.3, F44D12.4, H02112.5, 55G1.6, sas-5, C35D10.2,<br>T23B12.6, R01B10.4, F19B6.1, F47D12.7, Syntaxin, sss-1, esterase, crn-1, beta-transducin, hum-1, oma-2, cat-4, F01F1.12, T03F6.3, bir-1, R05H5.4, fem-3, num-1, F59B2.3, rfc-3, mxl-1                                              |
| embryonic cleavage (GO:0040016)                                    | 181       | 10             | 1.02E-06     | cyb-2.1, F22B3.4, ptr-2, H02112.5, C28C12.2, Syntaxin, F10C2.4, pri-1, gna-2, puf-3                                                                                                                                                                                                                                                                                                     |
| DNA replication (GO:0006260)                                       | 47        | 6              | 1.27E-06     | mucb, crn-1, thk-1, F10C2.4, pri-1, rfc-3                                                                                                                                                                                                                                                                                                                                               |
| chitin metabolic process (GO:0006030)                              | 13        | 3              | 0.000109     | cej-1, H02112.1, R02F2.4                                                                                                                                                                                                                                                                                                                                                                |
| DNA repair (GO:0006281)                                            | 104       | 6              | 0.000127     | F56A3.2, M04F3.1, mucb, crn-1, exo-3, rfc-3                                                                                                                                                                                                                                                                                                                                             |
| transferase activity (GO:0016740)                                  | 594       | 14             | 0.000139     | F22B3.4, cdk-5, hexokinase, F19B6.1, rskn-1, C34G6.5, mucb, thk-1, UDP-glucosyltransferase, F10C2.4, pri-1, ZK1058.3, R05H5.4, gna-2                                                                                                                                                                                                                                                    |
| nuclease activity (GO:0004518)                                     | 36        | 4              | 0.000144     | F56A3.2, crn-1, F10C2.4, exo-3                                                                                                                                                                                                                                                                                                                                                          |
| chitin binding (GO:0008061)                                        | 16        | 3              | 0.000211     | cej-1, H02112.1, R02F2.4                                                                                                                                                                                                                                                                                                                                                                |
| nucleotidyltransferase activity (GO:0016779)                       | 43        | 4              | 0.00029      | mucb, F10C2.4, pri-1, ZK1058.3                                                                                                                                                                                                                                                                                                                                                          |
| glutamate-ammonia ligase activity (GO:0004356)                     | 5         | 2              | 0.000543     | gln-6, gln-5                                                                                                                                                                                                                                                                                                                                                                            |
| glutamine biosynthetic process (GO:0006542)                        | 5         | 2              | 0.000543     | gln-6, gln-5                                                                                                                                                                                                                                                                                                                                                                            |
| centrosome (GO:0005813)                                            | 23        | 3              | 0.000642     | pie-1, oma-1, oma-2                                                                                                                                                                                                                                                                                                                                                                     |
| P granule (GO:0043186)                                             | 24        | 3              | 0.000729     | pie-1, oma-1, oma-2                                                                                                                                                                                                                                                                                                                                                                     |
| oocyte maturation (GO:0001556)                                     | 9         | 2              | 0.001916     | cyb-2.1, oma-1                                                                                                                                                                                                                                                                                                                                                                          |
| cleavage furrow (GO:0032154)                                       | 9         | 2              | 0.001916     | Syntaxin, unc-59                                                                                                                                                                                                                                                                                                                                                                        |
| nitrogen compound metabolic process (GO:0006807)                   | 11        | 2              | 0.002899     | gln-6, gln-5                                                                                                                                                                                                                                                                                                                                                                            |
| cell cycle (GO:0007049)                                            | 83        | 4              | 0.003432     | cyb-2.1, mei-2, sas-5, unc-59                                                                                                                                                                                                                                                                                                                                                           |
| protein domain specific binding (GO:0019904)                       | 12        | 2              | 0.003462     | num-1, mxl-1                                                                                                                                                                                                                                                                                                                                                                            |
| embryonic development (GO:0009790)                                 | 136       | 5              | 0.003512     | mei-2, ptr-2, lin-52, crn-1, exo-3                                                                                                                                                                                                                                                                                                                                                      |
| endonuclease activity (GO:0004519)                                 | 13        | 2              | 0.004071     | crn-1, exo-3                                                                                                                                                                                                                                                                                                                                                                            |
| carbohydrate metabolic process (GO:0005975)                        | 144       | 5              | 0.004478     | F22B3.4, F19B6.1, T03F6.3, ZK1058.3, F59B2.3                                                                                                                                                                                                                                                                                                                                            |
| reproduction (GO:0000003)                                          | 949       | 15             | 0.004696     | egg-4, F22B3.4, cdk-5, H02112.1, sqv-7, F19B6.1, ptr-2, Syntaxin, crn-1, oma-1, rme-2, chs-1, unc-59, gna-2, fem-3                                                                                                                                                                                                                                                                      |
| DNA-directed DNA polymerase activity (GO:0003887)                  | 14        | 2              | 0.004727     | mucb, F10C2.4                                                                                                                                                                                                                                                                                                                                                                           |
| catalytic activity (GO:0003824)                                    | 597       | 11             | 0.005056     | tdc-1, gln-6, F25H9.6, phosphatase, crn-1, oma-1, cat-4, C53A3.2, F01F1.12, ZK1058.3, gln-5                                                                                                                                                                                                                                                                                             |
| phosphoric monoester hydrolase activity (GO:0016791)               | 93        | 4              | 0.005151     | phosphatase, egg-4, daf-18, C53A3.2                                                                                                                                                                                                                                                                                                                                                     |
| morphogenesis of an epithelium (GO:0002009)                        | 233       | 6              | 0.008029     | sqv-7, daf-18, M04F3.1, crn-1, cpar-1, unc-59                                                                                                                                                                                                                                                                                                                                           |
| cell division (GO:0051301)                                         | 58        | 3              | 0.009251     | cyb-2.1, cdk-5, mei-2                                                                                                                                                                                                                                                                                                                                                                   |
| nucleosome assembly (GO:0006334)                                   | 58        | 3              | 0.009251     | C50F4.6, hil-4, cpar-1                                                                                                                                                                                                                                                                                                                                                                  |
| nucleosome (GO:0000786)                                            | 59        | 3              | 0.009694     | C50F4.6, hil-4, cpar-1                                                                                                                                                                                                                                                                                                                                                                  |
| kinase activity (GO:0016301)                                       | 319       | 7              | 0.009974     | cdk-5, hexokinase, F19B6.1, rskn-1, C34G6.5, thk-1, R05H5.4                                                                                                                                                                                                                                                                                                                             |

**S. Table 3. The Half-motif B is present in many of the 32 GBRs that contain a highly conserved Motif B.**

| GLD-1 BINDING REGIONS <sup>a</sup> | MOTIF B AND SURROUND SEQUENCES <sup>b</sup>                   | Spacing <sup>c</sup> |
|------------------------------------|---------------------------------------------------------------|----------------------|
| <i>rme-2</i> 3'UTR                 | NNTTCTAC <b>TAC</b> AAAAT <b>TACTAA</b> ATCAGATGTCTG          | 2                    |
| <i>rme-2</i> 5'end                 | CCACTTTT <b>TA</b> TTTCACA <b>TACTAA</b> TCAAGAACACNN         | 2                    |
| <i>exo-3</i> 5'end                 | NNNNGCC <b>TAC</b> TCGACT <b>TACTAA</b> CCTGTTGCTGAAA         | 2                    |
| <i>tra-2</i> 3'utr                 | TATT <b>TA</b> ATTTCTTATC <b>TACTCA</b> TATCTANNNNNN          | 6                    |
| <i>dna-2</i> 3'end                 | TCA <b>TA</b> TTTTCTATTCC <b>TACTCA</b> ACTG <b>TA</b> AAATTC | 6   4                |
| <i>dna-2</i> 3'end                 | NATTCCCGCCTTTTT <b>TACTCA</b> TT <b>TA</b> TTAGATTT           | 2                    |
| <i>hcp-3</i> 3'end                 | NAACA <b>TA</b> TTTGCA <b>TACTCA</b> TTTTTCGATCTT             | 3                    |
| F14B4.2 3'end                      | NCATGCATCCTCCCT <b>TACTAA</b> CTCCTTTCTTCA                    | N/A                  |
| <i>oma-1</i> 3'end                 | TATTCGTGTCCCCCA <b>TACTAA</b> <b>CTAA</b> <b>TAAT</b> GCCT    | 1   4                |
| <i>lin-45</i> 5'UTR                | CGCCCATCGT <b>TA</b> TTTT <b>TACTAA</b> TCATTTCTCGTCN         | N/A                  |
| <i>oma-1</i> 5'UTR                 | GATTGGAGATTTGGT <b>TACTCA</b> AACTGCT <b>TA</b> ACTTG         | 6                    |
| <i>cbd-1</i> 5'end                 | CCGTCTCGCTGCTTC <b>TACTAA</b> CATTTTTTTTCGAA                  | N/A                  |
| <i>rskn-1</i> 3'end                | TTCTTTTT <b>TAA</b> ATAC <b>TACTAA</b> CATT <b>TA</b> TCCAATT | 1   4                |
| <i>rskn-1</i> 3'end                | AATAAC <b>TA</b> ACTTTATT <b>TACTCA</b> TCACACTCATCC          | 4                    |
| T01C3.2 3'end                      | TCGAATTTCGTCACAAC <b>TACTAA</b> CAAGAAATGATT                  | N/A                  |
| <i>sss-1</i> 5'end                 | GCGAATTTTCATCGCTC <b>TACTAA</b> CCA <b>ACTA</b> CAATC         | N/A                  |
| <i>sss-1</i> 5'end                 | CAAC <b>TA</b> CAATCAACTC <b>TACTAA</b> CAC <b>TA</b> TGGTCAA | 6   3                |
| <i>nasp-2</i> 5'end                | GCGCTTTTGCTGATTC <b>TACTAA</b> CAT <b>TA</b> TCGCTCA          | 3                    |
| <i>nasp-2</i> 5'end                | CCACTGATTCGCCAC <b>TACTAA</b> CGAGNNNNNNN                     | N/A                  |
| <i>cdk-5</i> 3'end                 | CAC <b>TA</b> TGCACTTTCC <b>TACTCA</b> CATTGTTTTCTC           | 7                    |
| <i>sas-5</i> 3'end                 | <b>TA</b> ATGTCTGTGAATTG <b>TACTAA</b> AACCAT <b>TA</b> CTTC  | 6                    |
| <i>fem-3</i> 3'end                 | GTTTGAAATCTCTCGC <b>TACTCA</b> CCTC <b>TA</b> GATGTA          | 4                    |
| <i>cpg-1</i> 3'end                 | TAATC <b>TA</b> TCAAATGCC <b>TACTCA</b> TCCCAGTGCCAT          | 5                    |
| <i>gna-2</i> 5'UTR                 | CATTCACTTCT <b>TA</b> TTA <b>TACTCA</b> CTTCAANNNNN           | N/A                  |
| <i>cep-1</i> 3'end                 | NNNATTTCTCACT <b>TA</b> G <b>TACTCA</b> AACTGACATTTG          | N/A                  |
| <i>pri-1</i> 3'end                 | NNNAAGCACTTTC <b>TA</b> AG <b>TACTAA</b> CCCGGAAAACT          | N/A                  |
| <i>cye-1</i> 3'end                 | TAT <b>TA</b> ATGTTTTGTTTT <b>TACTCA</b> TCTCACTTCCNN         | 7                    |

<sup>a</sup> GBRs

<sup>b</sup> Stringent Motif Bs (red highlights) and surrounding UA dinucleotide (yellow highlights) are listed.

<sup>c</sup> The spacing between the UA dinucleotide of the Half-motif B and Motif B within each GBR.
